# Supplementary material for: Strengthening eco-friendly packaging from pectin by filling with poly(ε-caprolactone) nanoparticles and tailoring the degree of methyl-esterification
Source: Royal Society of Chemistry journal article supplement (doi:10.1039/d4ma00033a), 2024-01-01
Supplement: d4ma00033a1.pdf [file d4ma00033a1.pdf]

## Supporting Information

# Strengthening Eco-Friendly Packaging from Pectin by Filling with Poly( $\epsilon$ -caprolactone) Nanoparticles and Tailoring the Degree of Methyl-Esterification

### Names of authors:

Marcos Vinicius Lorevice<sup>a,b,1,\*</sup>; Graziela Solferini Baccarin<sup>a,b</sup>; Juliana R. Souza<sup>a,b</sup>; Pedro Ivo Cunha Claro<sup>b,c</sup>; Márcia Regina de Moura<sup>d</sup>; Caio Gomide Otoni<sup>c,\*</sup>; Luiz Henrique Capparelli Mattoso<sup>a,d</sup>

### Author affiliations:

<sup>a</sup>PPGQ, Department of Chemistry, Federal University of São Carlos – Rodovia Washington Luís km 235, São Carlos, SP 13566-905, Brazil (Lorevice: [marcos.lorevice@lnnano.cnpem.br](mailto:marcos.lorevice@lnnano.cnpem.br); Baccarin: [gsbaccarin@estudante.ufscar.br](mailto:gsbaccarin@estudante.ufscar.br); juhregline@gmail.com)

<sup>b</sup>National Nanotechnology Laboratory for Agriculture (LNNA), Embrapa Instrumentation – Rua XV de Novembro 1452, São Carlos, SP 13560-970, Brazil. (Mattoso: [luiz.mattoso@embrapa.br](mailto:luiz.mattoso@embrapa.br))

<sup>c</sup>PPG-CEM, Department of Materials Engineering, Federal University of São Carlos – Rodovia Washington Luís km 235, São Carlos, SP 13566-905, Brazil (Otoni: [caio.otoni@ufscar.br](mailto:caio.otoni@ufscar.br); Claro: [pedrocunhaclaro@ymail.com](mailto:pedrocunhaclaro@ymail.com))

<sup>d</sup>Department of Physics and Chemistry, FEIS, São Paulo State University – Av. Brasil 56, Ilha Solteira, SP 15385-000, Brazil (de Moura: [marcia.aouada@unesp.br](mailto:marcia.aouada@unesp.br))

### \*Corresponding Authors:

Caio Gomide Otoni  
[caio.otoni@ufscar.br](mailto:caio.otoni@ufscar.br)

<sup>c</sup>PPG-CEM, Department of Materials Engineering, Federal University of São Carlos – Rodovia Washington Luís km 235, São Carlos, SP 13566-905, Brazil

Marcos Vinicius Lorevice  
[marcos.lorevice@lnnano.cnpem.br](mailto:marcos.lorevice@lnnano.cnpem.br)

*Brazilian Nanotechnology National Laboratory (LNNano), Brazilian Center for Research in Energy and Materials (CNPEM), 13083-970 Campinas, São Paulo, Brazil*

<sup>1</sup>Present address: *Brazilian Nanotechnology National Laboratory (LNNano), Brazilian Center for Research in Energy and Materials (CNPEM), 13083-970 Campinas, São Paulo, Brazil*

### A. Complementary Dynamic Light Scattering Data

Table S1: Average size, PDI, and zeta potential of poly( $\epsilon$ -caprolactone) nanoparticles in three repetitions of the same synthesis protocol.

| Repetition | Size (nm)        | Polydispersity index | Zeta potential (mV) |
|------------|------------------|----------------------|---------------------|
| 1          | $144 \pm 7^b$    | $0.13 \pm 0.01^a$    | $-18 \pm 1^a$       |
| 2          | $126 \pm 6^{ab}$ | $0.12 \pm 0.02^a$    | $-17.1 \pm 0.5^a$   |
| 3          | $124 \pm 2^a$    | $0.10 \pm 0.01^a$    | $-17.2 \pm 0.5^a$   |

<sup>ab</sup> Mean values  $\pm$  standard deviations followed by the same lowercase superscript letters within a column are not different ( $p > 0.05$ ).

### B. Complementary FT-IR analysis

Table S2: Infrared spectroscopy of poly( $\epsilon$ -caprolactone) (PCL), Tween 80, and poly( $\epsilon$ -caprolactone) nanoparticles (PCLNP).

| PCL (cm <sup>-1</sup> ) | Tween 80 (cm <sup>-1</sup> ) | PCLNP (cm <sup>-1</sup> ) | Vibration              |
|-------------------------|------------------------------|---------------------------|------------------------|
| -                       | 3489                         | 3431                      | (-OH)                  |
| 2954                    | 2923                         | 2932                      | (C-H) asymmetrical     |
| 2862                    | 2860                         | 2866                      | (C-H) symmetrical      |
| 1729                    | 1735                         | 1725                      | (-C=O)                 |
| 1235                    | 1249                         | 1240                      | (-C-O-C-) asymmetrical |
| 1163                    | 1102                         | 1173                      | (-C-O-C-) symmetrical  |

### C. Complementary spectroscopy analysis

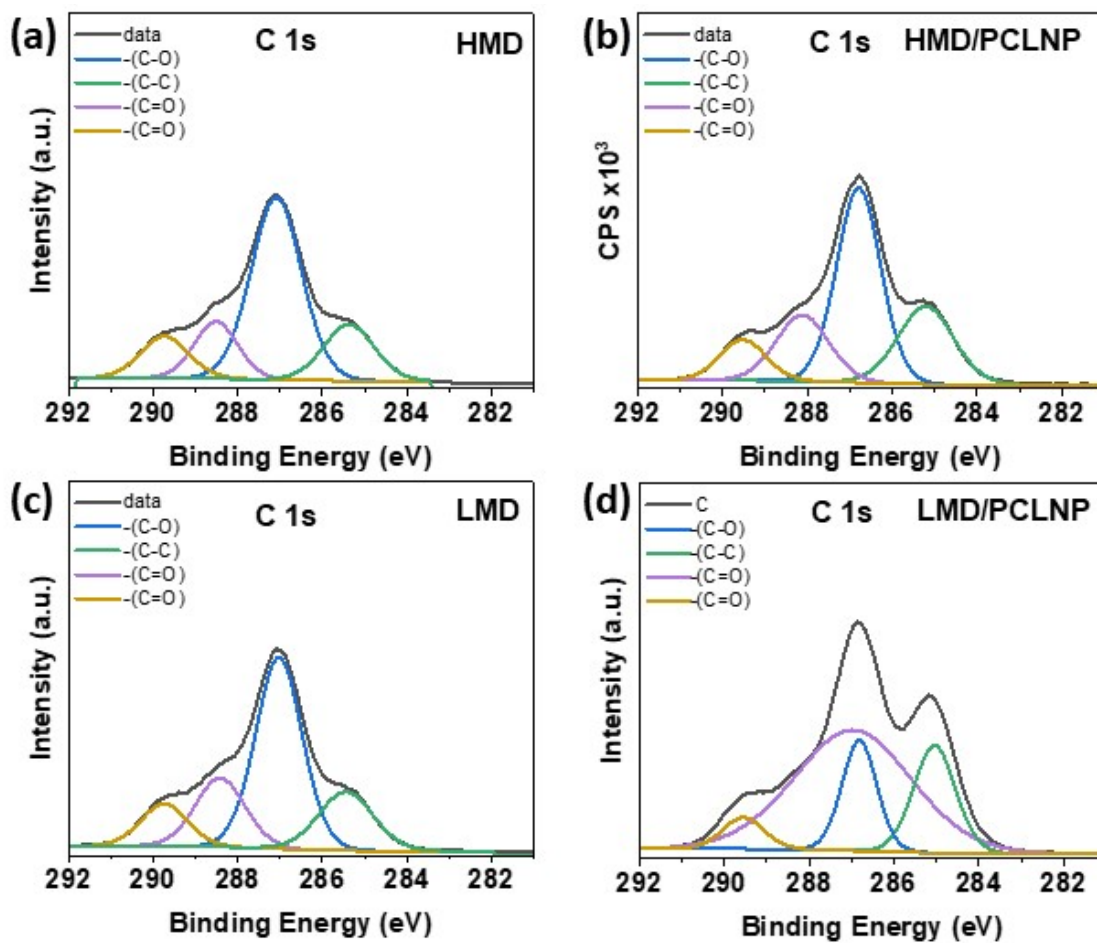

Figure S1. High-resolution XPS spectra of C1s for (a) HMD, (b) HMD/PCLNP, (c) LMD, and (d) LMD/PCLNP pectin-based films.

Table S3: Binding energy of pectin-based nanocomposites determined by C1s XPS deconvolution.

| Samples        | Peak Binding Energy (eV) |       |             |       |
|----------------|--------------------------|-------|-------------|-------|
|                | C-C/C-H                  | C-O   | O-C-O/C-O-H | O-C=O |
| HMD            | 285.4                    | 287.0 | 288.4       | 289.7 |
| LMD            | 285.4                    | 287.0 | 288.4       | 289.7 |
| HMD/PCLNP film | 285.3                    | 286.9 | 288.2       | 289.6 |
| LMD/PCLNP film | 285.1                    | 287.1 | 286.8       | 289.6 |

Table S4: Surface composition of pectin-based nanocomposites determined by C1s XPS deconvolution.

| Samples        | C1s XPS deconvolution (%) |          |             |          |
|----------------|---------------------------|----------|-------------|----------|
|                | C-C/C-H                   | C-O      | O-C-O/C-O-H | O-C=O    |
| HMD            | 14.3 ± 3                  | 56.0 ± 1 | 16.9 ± 1    | 12.8 ± 1 |
| LMD            | 16.0 ± 2                  | 51.9 ± 1 | 20.1 ± 1    | 12.0 ± 1 |
| HMD/PCLNP film | 23.2 ± 1                  | 47.1 ± 1 | 19.3 ± 1    | 10.4 ± 1 |
| LMD/PCLNP film | 15.7 ± 1                  | 59.5 ± 1 | 19.0 ± 3    | 5.8 ± 1  |

#### D. Complementary mechanical analysis

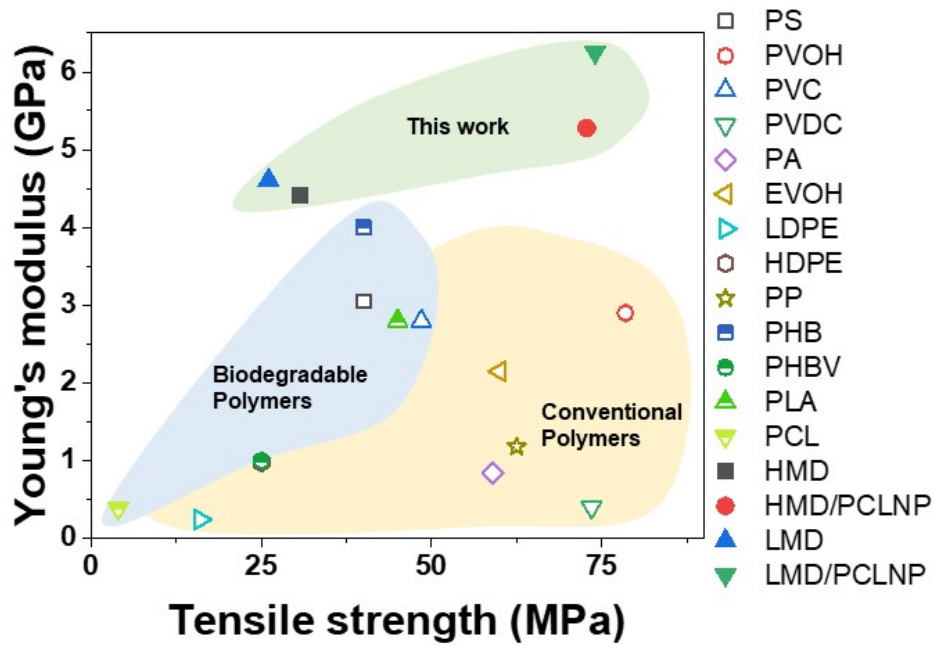

**Figure S2.** Young's modulus vs. Tensile strength for petroleum-based polymeric and nanocomposites films. The polymer acronyms meaning from up to bottom are: PS – *polystyrene*; PVOH - *polyvinyl alcohol*; PVC - *polyvinylchloride*; PVDC - *poly(vinylidene chloride)*; PA - *Polyamide (nylon)*; EVOH - *ethylene–vinyl alcohol copolymer*; LDPE - *low-density polyethylene*; HDPE - *high-density polyethylene*; PP – *polypropylene*; PHB - *Poly 3-hydroxybutyrate*; PHBV - *Poly(3-hydroxybutyrate-co-3-hydroxyvalerate)*; ; PLA - *poly(lactic acid)*; PCL - *poly( $\epsilon$ -caprolactone)*; HMD - *high-methoxyl-degree of pectin*; LMD - *low-methoxyl-degree of pectin*. The highlighted areas in blue, yellow and green have no physical meaning. They indicate, respectively, the biodegradable, conventional and the nanocomposites-BASED polymers compared. Data adapted from <sup>1,2</sup>.

## E. References

- 1 L. Bastarrachea, S. Dhawan and S. S. Sablani. *Food Engineering Reviews*. 2011. 3. 79–93.
- 2 R. A. Gross and B. Kalra. *AIChE (Am. Inst. Chem. Eng.) J.* 2002. **297**. 803–807.
